# Supplementary material for: Machine learning and bioinformatics analysis of diagnostic biomarkers associated with the occurrence and development of lung adenocarcinoma
Source: PeerJ journal article supplement (doi:10.7717/peerj.17746), 2024-07-23
Supplement: qPCR.xlsx [file qPCR.xlsx]

## Sheet: Sheet1
Grouping	Sample Number	CT Mean
		Internal reference genes	BUB1B	CENPF	PLK1
lung cancer	sample1	31.661	33.941	34.036	32.522
lung cancer	sample2	30.742	31.893	31.918	33.25
lung cancer	sample3	29.642	33.512	26.678	31.321
normal	sample4	31.026	32.763	33.067	33.242
normal	sample5	31.738	33.298	30.717	37.002
normal	sample6	30.485	34.311	29.594	33.67
lung cancer	sample7	30.265	32.761	30.331	32.907
lung cancer	sample8	30.303	32.857	29.75	32.523
lung cancer	sample9	30.426	32.241	29.973	33.63
normal	sample10	30.838	32.989	30.422	33.756
normal	sample11	30.782	32.663	29.305	34.004
normal	sample12	30.14	31.038	29.335	32.553
lung cancer	sample13	31.493	32.491	33.025	35.681
lung cancer	sample14	29.153	26.544	29.326	35.387
lung cancer	sample15	26.989	30.993	29.112	36.952
normal	sample16	30.689	32.659	33.115	37.755
normal	sample17	30.058	32.515	33.154	32.445
normal	sample18	31.138	31.402	31.681	39.884
